# Supplementary material for: The mir-84 and let-7 paralogous microRNA genes of Caenorhabditis elegans direct the cessation of molting via the conserved nuclear hormone receptors NHR-23 and NHR-25
Source: Oxford University Press journal article supplement (doi:10.1242/dev.02655), 2006-10-25
Supplement: dev02655-sup-dev2655tables1.pdf [file dev02655-sup-dev2655tables1.pdf]

**Table S1. Expression of *mlt-10p::gfp-pest* in *let-7(mg279) mir-84(tm1304)* adults upon RNAi against genes implicated in molting**

| RNAi              | Fluorescent (n) | Total (n) | % Fluorescent | Control Value | % Fluorescent (Normalized) | Chi-square | P-value |
|-------------------|-----------------|-----------|---------------|---------------|----------------------------|------------|---------|
| vector 1          | 30              | 55        | 55            | 55            | 100                        | N.A.       | N.A.    |
| vector 2          | 35              | 54        | 65            | 65            | 100                        | N.A.       | N.A.    |
| vector 3          | 19              | 25        | 76            | 76            | 100                        | N.A.       | N.A.    |
| vector 4          | 23              | 25        | 92            | 92            | 100                        | N.A.       | N.A.    |
| vector 5          | 81              | 99        | 82            | 82            | 100                        | N.A.       | N.A.    |
| vector 6          | 40              | 59        | 68            | 68            | 100                        | N.A.       | N.A.    |
| <i>gfp</i> 1      | 0               | 73        | 0             | 55            | 0                          | 52.01      | 0.001   |
| <i>gfp</i> 2      | 0               | 35        | 0             | 92            | 0                          | 23.20      | 0.001   |
| <i>gfp</i> 3      | 0               | 68        | 0             | 68            | 0                          | 67.29      | 0.001   |
| <i>rpl-27</i>     | 1               | 10        | 10            | 68            | 15                         | 11.85      | 0.001   |
| <i>rpl-32</i>     | 6               | 45        | 13            | 82            | 16                         | 72.77      | 0.001   |
| <i>rpl-31</i>     | 13              | 88        | 15            | 82            | 18                         | 83.77      | 0.001   |
| <i>nhr-23</i>     | 13              | 66        | 20            | 82            | 24                         | 62.34      | 0.001   |
| <i>nhr-23</i>     | 16              | 73        | 22            | 55            | 40                         | 14.50      | 0.001   |
| <i>Y37D8A.21</i>  | 38              | 106       | 36            | 82            | 44                         | 44.42      | 0.001   |
| <i>vha-9</i>      | 19              | 65        | 29            | 65            | 45                         | 15.07      | 0.001   |
| <i>bli-1</i>      | 17              | 55        | 31            | 65            | 48                         | 12.56      | 0.001   |
| <i>ZK430.8</i>    | 16              | 46        | 35            | 65            | 54                         | 8.97       | 0.010   |
| <i>pod-2</i>      | 14              | 36        | 39            | 65            | 60                         | 5.85       | 0.025   |
| <i>nhr-25</i>     | 7               | 15        | 47            | 76            | 61                         | 3.55       | 0.100   |
| <i>pan-1</i>      | 26              | 61        | 43            | 65            | 66                         | 5.66       | 0.025   |
| <i>acn-1</i>      | 20              | 40        | 50            | 76            | 66                         | 4.33       | 0.050   |
| <i>nas-36</i>     | 29              | 79        | 37            | 55            | 67                         | 4.19       | 0.050   |
| <i>ran-4</i>      | 24              | 52        | 46            | 65            | 71                         | 3.74       | 0.100   |
| <i>Y48B6A.3</i>   | 30              | 65        | 46            | 65            | 71                         | 4.14       | 0.050   |
| <i>vha-16</i>     | 54              | 92        | 59            | 82            | 72                         | 12.30      | 0.001   |
| <i>stc-1</i>      | 44              | 94        | 47            | 65            | 72                         | 4.47       | 0.050   |
| <i>rps-6</i>      | 43              | 72        | 60            | 82            | 73                         | 10.21      | 0.010   |
| <i>lrp-1</i>      | 13              | 32        | 41            | 55            | 74                         | 1.57       | 1.000   |
| <i>rme-8</i>      | 24              | 48        | 50            | 65            | 77                         | 2.29       | 0.200   |
| <i>unc-52</i>     | 29              | 58        | 50            | 65            | 77                         | 2.51       | 0.200   |
| <i>F40G9.1</i>    | 29              | 57        | 51            | 65            | 78                         | 2.21       | 0.200   |
| <i>rps-32</i>     | 25              | 42        | 60            | 76            | 78                         | 1.89       | 0.200   |
| <i>F53B8.1</i>    | 29              | 56        | 52            | 65            | 80                         | 1.92       | 0.200   |
| <i>F20G4.1</i>    | 22              | 42        | 52            | 65            | 81                         | 1.51       | 1.000   |
| <i>Y51H1A.3</i>   | 53              | 79        | 67            | 82            | 82                         | 5.12       | 0.025   |
| <i>vha-8</i>      | 20              | 26        | 77            | 92            | 84                         | 2.19       | 0.200   |
| <i>mlt-10</i>     | 19              | 41        | 46            | 55            | 84                         | 0.63       | 1.000   |
| <i>kin-2</i>      | 27              | 42        | 64            | 76            | 85                         | 1.00       | 1.000   |
| <i>mlt-9</i>      | 11              | 17        | 65            | 76            | 85                         | 0.63       | 1.000   |
| <i>lir-1</i>      | 30              | 54        | 56            | 65            | 85                         | 0.97       | 1.000   |
| <i>Y65B4A.6</i>   | 32              | 44        | 73            | 82            | 89                         | 1.52       | 1.000   |
| <i>lrp-1</i>      | 69              | 94        | 73            | 82            | 90                         | 1.97       | 0.200   |
| <i>K04A8.6</i>    | 31              | 50        | 62            | 68            | 91                         | 0.40       | 1.000   |
| <i>fbn-1</i>      | 49              | 82        | 60            | 65            | 92                         | 0.35       | 1.000   |
| <i>F53G12.4</i>   | 32              | 63        | 51            | 55            | 92                         | 0.17       | 1.000   |
| <i>let-805</i>    | 38              | 63        | 60            | 65            | 93                         | 0.25       | 1.000   |
| <i>nhr-6</i>      | 24              | 47        | 51            | 55            | 93                         | 0.12       | 1.000   |
| <i>est-1</i>      | 48              | 63        | 76            | 82            | 93                         | 0.75       | 1.000   |
| <i>mlt-11</i>     | 45              | 63        | 71            | 76            | 94                         | 0.19       | 1.000   |
| <i>Y54E10BR.5</i> | 44              | 57        | 77            | 82            | 94                         | 0.49       | 1.000   |
| <i>imb-3</i>      | 55              | 71        | 77            | 82            | 94                         | 0.49       | 1.000   |
| <i>C23G10.10</i>  | 42              | 54        | 78            | 82            | 95                         | 0.36       | 1.000   |
| <i>Y47D3B.1</i>   | 40              | 51        | 78            | 82            | 96                         | 0.25       | 1.000   |
| <i>R06A4.9</i>    | 15              | 23        | 65            | 68            | 96                         | 0.05       | 1.000   |
| <i>ntl-1</i>      | 45              | 72        | 63            | 65            | 96                         | 0.07       | 1.000   |
| <i>F49C12.12</i>  | 24              | 27        | 89            | 92            | 97                         | 0.14       | 1.000   |
| <i>ifc-2</i>      | 36              | 49        | 73            | 76            | 97                         | 0.06       | 1.000   |
| <i>M03F4.7</i>    | 38              | 51        | 75            | 76            | 98                         | 0.02       | 1.000   |
| <i>mec-7</i>      | 63              | 78        | 81            | 82            | 98                         | 0.03       | 1.000   |
| <i>ptr-23</i>     | 39              | 60        | 65            | 65            | 100                        | 0.00       | 1.000   |
| <i>C23F12.1</i>   | 16              | 21        | 76            | 76            | 100                        | 0.00       | 1.000   |
| <i>alg-1</i>      | 26              | 34        | 76            | 76            | 101                        | 0.00       | 1.000   |
| <i>ptr-4</i>      | 39              | 51        | 76            | 76            | 101                        | 0.00       | 1.000   |
| <i>adt-2</i>      | 36              | 47        | 77            | 76            | 101                        | 0.00       | 1.000   |

|                  |    |     |    |    |     |      |       |
|------------------|----|-----|----|----|-----|------|-------|
| <i>dmd-5</i>     | 33 | 50  | 66 | 65 | 102 | 0.02 | 1.000 |
| <i>Y53F4B.22</i> | 99 | 118 | 84 | 82 | 102 | 0.16 | 1.000 |
| <i>nsf-1</i>     | 22 | 39  | 56 | 55 | 103 | 0.03 | 1.000 |
| <i>W03F9.10</i>  | 82 | 97  | 85 | 82 | 103 | 0.26 | 1.000 |
| <i>F38A1.8</i>   | 29 | 37  | 78 | 76 | 103 | 0.05 | 1.000 |
| <i>mlt-8</i>     | 35 | 52  | 67 | 65 | 104 | 0.07 | 1.000 |
| <i>bli-5</i>     | 34 | 43  | 79 | 76 | 104 | 0.09 | 1.000 |
| <i>lin-66</i>    | 47 | 55  | 85 | 82 | 104 | 0.33 | 1.000 |
| <i>let-92</i>    | 24 | 30  | 80 | 76 | 105 | 0.13 | 1.000 |
| <i>vrs-2</i>     | 65 | 75  | 87 | 82 | 106 | 0.74 | 1.000 |
| <i>D1054.15</i>  | 84 | 104 | 81 | 76 | 106 | 0.28 | 1.000 |
| <i>C37C3.3</i>   | 38 | 47  | 81 | 76 | 106 | 0.23 | 1.000 |
| <i>T25B9.10</i>  | 45 | 51  | 88 | 82 | 108 | 1.03 | 1.000 |
| <i>crs-2</i>     | 30 | 41  | 73 | 68 | 108 | 0.33 | 1.000 |
| <i>F25H8.6</i>   | 53 | 60  | 88 | 82 | 108 | 1.20 | 1.000 |
| <i>lev-11</i>    | 38 | 43  | 88 | 82 | 108 | 0.95 | 1.000 |
| <i>M03F8.3</i>   | 41 | 50  | 82 | 76 | 108 | 0.38 | 1.000 |
| <i>npp-20</i>    | 36 | 49  | 73 | 68 | 108 | 0.41 | 1.000 |
| <i>T23F2.1</i>   | 23 | 28  | 82 | 76 | 108 | 0.30 | 1.000 |
| <i>qua-1</i>     | 81 | 115 | 70 | 65 | 108 | 0.54 | 1.000 |
| <i>npp-6</i>     | 26 | 31  | 84 | 76 | 110 | 0.54 | 1.000 |
| <i>F56C9.12</i>  | 39 | 43  | 91 | 82 | 111 | 1.81 | 0.200 |
| <i>skp-1</i>     | 60 | 71  | 85 | 76 | 111 | 0.92 | 1.000 |
| <i>noah-2</i>    | 29 | 34  | 85 | 76 | 112 | 0.82 | 1.000 |
| <i>T19A5.3</i>   | 23 | 30  | 77 | 68 | 113 | 0.76 | 1.000 |
| <i>nas-37</i>    | 24 | 28  | 86 | 76 | 113 | 0.81 | 1.000 |
| <i>bli-4</i>     | 18 | 29  | 62 | 55 | 113 | 0.44 | 1.000 |
| <i>pas-7</i>     | 80 | 86  | 93 | 82 | 113 | 5.12 | 0.025 |
| <i>psa-1</i>     | 44 | 57  | 77 | 68 | 114 | 1.28 | 1.000 |
| <i>pas-1</i>     | 28 | 36  | 78 | 68 | 114 | 1.09 | 1.000 |
| <i>bli-3</i>     | 53 | 84  | 63 | 55 | 115 | 1.01 | 1.000 |
| <i>gei-16</i>    | 94 | 98  | 96 | 82 | 117 | 9.87 | 0.010 |
| <i>noah-1</i>    | 39 | 60  | 65 | 55 | 118 | 1.31 | 1.000 |
| <i>T01C3.1</i>   | 61 | 67  | 91 | 76 | 120 | 3.63 | 0.100 |
| <i>K12H4.4</i>   | 52 | 57  | 91 | 76 | 120 | 3.47 | 0.100 |
| <i>mua-6</i>     | 12 | 13  | 92 | 76 | 121 | 1.51 | 1.000 |
| <i>emo-1</i>     | 48 | 57  | 84 | 68 | 124 | 4.27 | 0.050 |
| <i>ZC13.3</i>    | 33 | 39  | 85 | 68 | 124 | 3.50 | 0.100 |
| <i>pbs-5</i>     | 59 | 69  | 86 | 65 | 132 | 7.20 | 0.010 |
| <i>nhr-41</i>    | 29 | 38  | 76 | 55 | 139 | 4.59 | 0.050 |

Populations of GR1348 (*let-7(mg279) mir-84(tm1304) mgl549(mlt-10p::gfp pest)*) animals were synchronized as L1 larvae, fed *E. coli* OP50 until the 4th larval stage, and then fed bacteria expressing dsRNA corresponding to the indicated genes. As a control, worms were fed bacteria not expressing dsRNA against a worm gene. Animals were examined for any detectable fluorescence approximately 18 hours later, when the majority of control animals expressed GFP. Values represent combined results from two independent experiments. Clones that yielded  $\leq 80\%$  normalized fluorescence with a *P*-value  $>0.001$  were tested again (not shown). Only RNAi of *nhr-25* significantly suppressed ( $P\leq 0.001$ ) both GFP expression and lethality in the additional test.
