# Supplementary material for: The mir-84 and let-7 paralogous microRNA genes of Caenorhabditis elegans direct the cessation of molting via the conserved nuclear hormone receptors NHR-23 and NHR-25
Source: Oxford University Press journal article supplement (doi:10.1242/dev.02655), 2006-10-25
Supplement: dev02655-sup-dev2655tables2.pdf [file dev02655-sup-dev2655tables2.pdf]

**Table S2. Viability of *let-7(mg279) mir-84(tm1304)* mutant adults following inactivation of genes implicated in molting**

| RNAi           | Viable (n) | Total (n) | % Viable | Chi-square | P-value |
|----------------|------------|-----------|----------|------------|---------|
| vector 1       | 6          | 117       | 5        | N.A.       | N.A.    |
| <i>gfp</i> 1   | 2          | 137       | 1        | 2.78       | 0.100   |
| vector 2       | 2          | 124       | 2        | N.A.       | N.A.    |
| <i>gfp</i> 2   | 1          | 59        | 2        | 0.00       | 1.000   |
| <i>nhr-23</i>  | 63         | 63        | 100      | 155.92     | 0.001   |
| <i>nhr-23</i>  | 141        | 148       | 95       | 237.36     | 0.001   |
| <i>nhr-25</i>  | 18         | 21        | 86       | 80.48      | 0.001   |
| <i>rpl-32</i>  | 27         | 60        | 45       | 57.33      | 0.001   |
| <i>rpl-27</i>  | 5          | 15        | 33       | 28.15      | 0.001   |
| <i>rpl-31</i>  | 17         | 67        | 25       | 27.41      | 0.001   |
| Y37D8A.21      | 19         | 81        | 23       | 25.43      | 0.001   |
| <i>rps-6</i>   | 10         | 60        | 17       | 15.03      | 0.001   |
| <i>vha-16</i>  | 14         | 89        | 16       | 14.86      | 0.001   |
| <i>rps-32</i>  | 8          | 52        | 15       | 4.98       | 0.050   |
| <i>nsf-1</i>   | 4          | 38        | 11       | 1.38       | 1.000   |
| <i>pas-1</i>   | 4          | 39        | 10       | 6.25       | 0.025   |
| <i>vha-9</i>   | 5          | 49        | 10       | 1.44       | 1.000   |
| <i>noah-1</i>  | 5          | 53        | 9        | 1.12       | 1.000   |
| F20G4.1        | 3          | 33        | 9        | 0.72       | 1.000   |
| <i>mua-6</i>   | 1          | 11        | 9        | 0.31       | 1.000   |
| <i>pod-2</i>   | 3          | 35        | 9        | 0.57       | 1.000   |
| <i>noah-2</i>  | 3          | 35        | 9        | 0.57       | 1.000   |
| <i>bli-1</i>   | 4          | 50        | 8        | 0.51       | 1.000   |
| <i>pan-1</i>   | 4          | 51        | 8        | 0.47       | 1.000   |
| <i>lev-11</i>  | 3          | 39        | 8        | 3.69       | 0.100   |
| <i>acn-1</i>   | 3          | 43        | 7        | 0.20       | 1.000   |
| F25H8.6        | 3          | 49        | 6        | 2.54       | 0.200   |
| <i>stc-1</i>   | 5          | 82        | 6        | 0.09       | 1.000   |
| T01C3.1        | 4          | 69        | 6        | 0.04       | 1.000   |
| <i>let-92</i>  | 2          | 39        | 5        | 0.00       | 1.000   |
| <i>ntl-1</i>   | 3          | 64        | 5        | 0.02       | 1.000   |
| <i>emo-1</i>   | 2          | 43        | 5        | 1.26       | 1.000   |
| C37C3.3        | 2          | 43        | 5        | 0.02       | 1.000   |
| <i>nas-36</i>  | 3          | 66        | 5        | 0.03       | 1.000   |
| W03F9.10       | 3          | 67        | 4        | 1.40       | 1.000   |
| F53G12.4       | 2          | 45        | 4        | 0.03       | 1.000   |
| T25B9.10       | 2          | 46        | 4        | 1.09       | 1.000   |
| F49C12.12      | 1          | 23        | 4        | 0.02       | 1.000   |
| <i>alg-1</i>   | 2          | 47        | 4        | 0.06       | 1.000   |
| Y48B6A.3       | 2          | 49        | 4        | 0.08       | 1.000   |
| C23G10.10      | 2          | 51        | 4        | 0.86       | 1.000   |
| M03F8.3        | 2          | 52        | 4        | 0.13       | 1.000   |
| K12H4.4        | 2          | 53        | 4        | 0.15       | 1.000   |
| <i>imb-3</i>   | 2          | 59        | 3        | 0.59       | 1.000   |
| Y51H1A.3       | 2          | 61        | 3        | 0.54       | 1.000   |
| <i>qua-1</i>   | 3          | 93        | 3        | 0.46       | 1.000   |
| <i>mlt-11</i>  | 2          | 65        | 3        | 0.42       | 1.000   |
| <i>bli-3</i>   | 2          | 70        | 3        | 0.55       | 1.000   |
| <i>npp-20</i>  | 1          | 37        | 3        | 0.19       | 1.000   |
| D1054.15       | 3          | 111       | 3        | 0.88       | 1.000   |
| <i>mlt-10</i>  | 1          | 38        | 3        | 0.41       | 1.000   |
| F56C9.12       | 1          | 40        | 3        | 0.13       | 1.000   |
| <i>lin-66</i>  | 1          | 40        | 3        | 0.13       | 1.000   |
| T23F2.1        | 1          | 40        | 3        | 0.48       | 1.000   |
| K04A8.6        | 2          | 82        | 2        | 0.18       | 1.000   |
| Y65B4A.6       | 1          | 42        | 2        | 0.10       | 1.000   |
| <i>let-805</i> | 1          | 42        | 2        | 0.02       | 1.000   |
| <i>mlt-8</i>   | 1          | 43        | 2        | 0.59       | 1.000   |
| F40G9.1        | 1          | 43        | 2        | 0.03       | 1.000   |
| <i>crs-2</i>   | 1          | 44        | 2        | 0.08       | 1.000   |
| ZK430.8        | 1          | 44        | 2        | 0.63       | 1.000   |
| <i>adt-2</i>   | 1          | 47        | 2        | 0.74       | 1.000   |
| <i>bli-5</i>   | 1          | 48        | 2        | 0.78       | 1.000   |
| <i>mec-7</i>   | 1          | 49        | 2        | 0.04       | 1.000   |
| <i>lir-1</i>   | 1          | 49        | 2        | 0.82       | 1.000   |
| <i>psa-1</i>   | 1          | 50        | 2        | 0.03       | 1.000   |
| <i>ifc-2</i>   | 1          | 50        | 2        | 0.85       | 1.000   |

|                   |   |     |   |      |       |
|-------------------|---|-----|---|------|-------|
| <i>skp-1</i>      | 1 | 62  | 2 | 1.33 | 1.000 |
| <i>vrs-2</i>      | 1 | 66  | 2 | 0.00 | 1.000 |
| <i>lrp-1</i>      | 1 | 109 | 1 | 0.22 | 1.000 |
| <i>pas-7</i>      | 0 | 81  | 0 | 1.32 | 1.000 |
| <i>Y47D3B.1</i>   | 0 | 53  | 0 | 0.86 | 1.000 |
| <i>est-1</i>      | 0 | 57  | 0 | 0.93 | 1.000 |
| <i>gei-16</i>     | 0 | 88  | 0 | 1.43 | 1.000 |
| <i>Y54E10BR.5</i> | 0 | 47  | 0 | 0.77 | 1.000 |
| <i>Y53F4B.22</i>  | 0 | 71  | 0 | 1.16 | 1.000 |
| <i>ZC13.3</i>     | 0 | 30  | 0 | 0.49 | 1.000 |
| <i>T19A5.3</i>    | 0 | 27  | 0 | 0.44 | 1.000 |
| <i>R06A4.9</i>    | 0 | 21  | 0 | 0.34 | 1.000 |
| <i>lrp-1</i>      | 0 | 27  | 0 | 1.44 | 1.000 |
| <i>nhr-6</i>      | 0 | 38  | 0 | 2.03 | 0.200 |
| <i>nhr-41</i>     | 0 | 33  | 0 | 1.76 | 0.200 |
| <i>bli-4</i>      | 0 | 36  | 0 | 1.92 | 0.200 |
| <i>dmd-5</i>      | 0 | 39  | 0 | 2.08 | 0.200 |
| <i>rme-8</i>      | 0 | 50  | 0 | 2.66 | 0.200 |
| <i>ran-4</i>      | 0 | 41  | 0 | 2.19 | 0.200 |
| <i>F53B8.1</i>    | 0 | 43  | 0 | 2.29 | 0.200 |
| <i>pbs-5</i>      | 0 | 45  | 0 | 2.40 | 0.200 |
| <i>ptr-23</i>     | 0 | 37  | 0 | 1.97 | 0.200 |
| <i>fbn-1</i>      | 0 | 63  | 0 | 3.34 | 0.100 |
| <i>unc-52</i>     | 0 | 50  | 0 | 2.66 | 0.200 |
| <i>F38A1.8</i>    | 0 | 31  | 0 | 1.66 | 0.200 |
| <i>npp-6</i>      | 0 | 32  | 0 | 1.71 | 0.200 |
| <i>kin-2</i>      | 0 | 44  | 0 | 2.34 | 0.200 |
| <i>ptr-4</i>      | 0 | 41  | 0 | 2.19 | 0.200 |
| <i>M03F4.7</i>    | 0 | 40  | 0 | 2.13 | 0.200 |
| <i>C23F12.1</i>   | 0 | 17  | 0 | 0.91 | 1.000 |
| <i>nas-37</i>     | 0 | 24  | 0 | 1.29 | 1.000 |
| <i>mlt-9</i>      | 0 | 10  | 0 | 0.54 | 1.000 |
| <i>vha-8</i>      | 0 | 31  | 0 | 1.66 | 0.200 |

Viability of the identical animals described for Table S1 was assessed by visual inspection approximately 45 hours after transfer to *E. coli* expressing dsRNA. Values for particular gene inactivations represent the combined results from two independent experiments. In this table, values reported for vector 1 and vector 2 include the combined results from multiple independent samples reported separately in Table S1 as, respectively, vector 1, 2, 3, and 4, or vector 5 and 6. Note that RNAi of a very small number of these genes, including Y37D8A.21, did not reproducibly interfere with molting of larvae, and those particular genes were therefore not discussed in Frand et al., 2005.
